# Supplementary material for: Nme1 and Nme2 genes exert metastasis-suppressor activities in a genetically engineered mouse model of UV-induced melanoma
Source: PubMed Central journal article supplement (PMC7782836; doi:10.1038/s41416-020-01096-w), 2020-10-07
Supplement: 41416_2020_1096_MOESM1_ESM.pdf [file 41416_2020_1096_MOESM1_ESM.pdf]

**Supplementary Table 1.** Statistical comparisons of gender distribution, tumor location and metastasis incidence

**A.** Gender distribution in HP, HPN1 and HPN2 mice

| Genotype | Total Mice | Male | Female | % Male | % Female | Chi-square P-Value |            |
|----------|------------|------|--------|--------|----------|--------------------|------------|
|          |            |      |        |        |          | HP vs HPN1         | HP vs HPN2 |
| HP       | 20         | 14   | 6      | 70.0   | 30.0     |                    |            |
| HPN1     | 24         | 15   | 9      | 62.5   | 37.5     | 0.102              |            |
| HPN2     | 25         | 8    | 17     | 32.0   | 68.0     |                    | < 0.001    |

**B.** Anatomical locations of primary melanomas in HP, HPN1 and HPN2 mice

| Genotype | Back/Neck/Top of head/Flanks |      | Extremities: Hindlegs/Forelegs/Tail/Ears |      | Face: Cheeks/ Nose |     | Chi-square P-Value |            |
|----------|------------------------------|------|------------------------------------------|------|--------------------|-----|--------------------|------------|
|          | Total                        | %    | Total                                    | %    | Total              | %   | HP vs HPN1         | HP vs HPN2 |
| HP       | 59                           | 85.5 | 8                                        | 11.6 | 2                  | 2.9 |                    |            |
| HPN1     | 48                           | 82.8 | 8                                        | 13.8 | 2                  | 3.4 | 0.359              |            |
| HPN2     | 48                           | 80.0 | 7                                        | 11.7 | 5                  | 8.3 |                    | 0.036      |

**C.** Incidence of primary face melanomas in HP, HPN1 and HPN2 mice

| Genotype | Face tumor positive | Face tumor negative | Chi-square P-Value |            |
|----------|---------------------|---------------------|--------------------|------------|
|          |                     |                     | HP vs HPN1         | HP vs HPN2 |
| HP       | 2                   | 18                  |                    |            |
| HPN1     | 2                   | 22                  | 0.346              |            |
| HPN2     | 5                   | 20                  |                    | 0.030      |

**D.** Incidence of lung metastases in HP, HPN1 and HPN2 mice

| Genotype | Total Mice | Metastasis-positive | Metastasis-negative | % Metastasis-positive | % Metastasis-negative | Chi-square P-Value |            |
|----------|------------|---------------------|---------------------|-----------------------|-----------------------|--------------------|------------|
|          |            |                     |                     |                       |                       | HP vs HPN1         | HP vs HPN2 |
| HP       | 20         | 5                   | 15                  | 25.0                  | 75.0                  |                    |            |
| HPN1     | 24         | 18                  | 6                   | 75.0                  | 25.0                  | < 0.001            |            |
| HPN2     | 25         | 18                  | 7                   | 72.0                  | 28.0                  |                    | < 0.001    |

**E.** Incidence of lymph node enlargement in HP, HPN1 and HPN2 mice

| Genotype | Total Mice | Enlargement-positive | Enlargement-negative | % Enlargement-positive | % Enlargement-negative | Chi-square P-Value |            |
|----------|------------|----------------------|----------------------|------------------------|------------------------|--------------------|------------|
|          |            |                      |                      |                        |                        | HP vs HPN1         | HP vs HPN2 |
| HP       | 20         | 13                   | 15                   | 25.0                   | 75.0                   |                    |            |
| HPN1     | 24         | 22                   | 2                    | 91.7                   | 8.3                    | < 0.001            |            |
| HPN2     | 25         | 21                   | 4                    | 84.0                   | 16.0                   |                    | < 0.001    |
