# Supplementary material for: Nme1 and Nme2 genes exert metastasis-suppressor activities in a genetically engineered mouse model of UV-induced melanoma
Source: PubMed Central journal article supplement (PMC7782836; doi:10.1038/s41416-020-01096-w), 2020-10-07
Supplement: 41416_2020_1096_MOESM2_ESM.pdf [file 41416_2020_1096_MOESM2_ESM.pdf]

**Supplementary Table 2.** Histological characteristics of primary melanomas and metastases

| <b>Mouse ID</b> | <b>Tissue</b>             | <b>Histological Characteristics</b>                                     |
|-----------------|---------------------------|-------------------------------------------------------------------------|
| HP9             | Primary melanoma          | Epithelioid and dendritic heavily pigmented melanoma cells              |
|                 | Right axillary lymph node | Clusters of epithelioid heavily pigmented melanoma cells                |
| HP20            | Primary melanoma          | Epithelioid and dendritic heavily pigmented melanoma cells              |
|                 | Left cervical lymph node  | Epithelioid and dendritic heavily pigmented melanoma cells              |
|                 | Lung                      | Negative                                                                |
| HPN1-1          | Primary melanoma          | Mainly dendritic with some epithelioid heavily pigmented melanoma cells |
|                 | Left cervical lymph node  | Epithelioid and dendritic heavily pigmented melanoma cells              |
|                 | Lung                      | Clusters of epithelioid heavily pigmented melanoma cells                |
|                 | Liver                     | Clusters of epithelioid heavily pigmented melanoma cells                |
| HPN1-2          | Primary melanoma          | Epithelioid and dendritic heavily pigmented melanoma cells              |
|                 | Left axillary lymph node  | Replaced by epithelioid and dendritic heavily pigmented cells           |
|                 | Lung                      | Microscopic foci of epithelioid heavily pigmented cells                 |
| HPN2-4          | Primary melanoma          | Mainly dendritic with some epithelioid heavily pigmented melanoma cells |
|                 | Left cervical lymph node  | Replaced by epithelioid and dendritic heavily pigmented cells           |
|                 | Lung                      | Microscopic foci of epithelioid heavily pigmented cells                 |
| HPN2-22         | Primary melanoma          | Mainly dendritic with some epithelioid heavily pigmented melanoma cells |
|                 | Left brachial lymph node  | Replaced by epithelioid and dendritic heavily pigmented cells           |
|                 | Lung                      | Microscopic foci of epithelioid heavily pigmented cells                 |
