# Supplementary material for: Nme1 and Nme2 genes exert metastasis-suppressor activities in a genetically engineered mouse model of UV-induced melanoma
Source: PubMed Central journal article supplement (PMC7782836; doi:10.1038/s41416-020-01096-w), 2020-10-07
Supplement: 41416_2020_1096_MOESM3_ESM.pdf [file 41416_2020_1096_MOESM3_ESM.pdf]

**Supplementary Table 3.** Statistical comparisons of tumor growth characteristics and metastasis scores

**A.** Comparisons of tumor growth characteristics and metastasis scores for HP vs HPN1 mice

| Variable                                                             | Test*         | HP n | HPN1 n | HP Mean | HP SEM | HPN1 Mean | HPN1 SEM | P-Value | HP Median | HP 25% | HP 75% | HPN1 Median | HPN1 25% | HPN1 75% | P-Value |
|----------------------------------------------------------------------|---------------|------|--------|---------|--------|-----------|----------|---------|-----------|--------|--------|-------------|----------|----------|---------|
| Tumor onset days post-irradiation                                    | t-test        | 20   | 24     | 135.5   | 9.9    | 147.2     | 11.6     | 0.460   |           |        |        |             |          |          |         |
| Days between onset and endpoint                                      | t-test        | 20   | 24     | 121.3   | 11.7   | 100.7     | 9.4      | 0.173   |           |        |        |             |          |          |         |
| Number of primary tumors monitored for growth                        | Rank sum test | 20   | 24     |         |        |           |          |         | 3.0       | 1.0    | 4.0    | 2.0         | 1.0      | 2.0      | 0.036   |
| Largest tumor at necropsy volume mm <sup>3</sup>                     | Rank sum test | 20   | 24     |         |        |           |          |         | 70.0      | 48.2   | 191.6  | 258.3       | 70.4     | 638.9    | 0.061   |
| Slope of growth curve for largest tumor: (tumor volume)/Days post-UV | Rank sum test | 20   | 24     |         |        |           |          |         | 0.0083    | 0.0058 | 0.0154 | 0.0125      | 0.0077   | 0.0166   | 0.263   |
| Final Combined Tumor Volume mm <sup>3</sup>                          | Rank sum test | 20   | 24     |         |        |           |          |         | 210.4     | 125.5  | 402.9  | 318.6       | 115.9    | 770.9    | 0.225   |
| Lung metastasis score                                                | Rank sum test | 20   | 24     |         |        |           |          |         | 0.0       | 0.0    | 1.5    | 10.0        | 0.3      | 76.5     | < 0.001 |
| Composite lymph node volume score                                    | Rank sum test | 20   | 24     |         |        |           |          |         | 1.5       | 0.0    | 6.8    | 8.0         | 5.0      | 24.5     | 0.002   |

**B.** Comparisons of tumor growth characteristics and metastasis scores for HP vs HPN2 mice

| Variable                                                             | Test*         | HP n | HPN2 n | HP Mean | HP SEM | HPN2 Mean | HPN2 SEM | P-Value | HP Median | HP 25% | HP 75% | HPN2 Median | HPN2 25% | HPN2 75% | P-Value |
|----------------------------------------------------------------------|---------------|------|--------|---------|--------|-----------|----------|---------|-----------|--------|--------|-------------|----------|----------|---------|
| Tumor onset days post-irradiation                                    | t-test        | 20   | 25     | 135.5   | 9.9    | 112.6     | 10.5     | 0.126   |           |        |        |             |          |          |         |
| Days between onset and endpoint                                      | t-test        | 20   | 25     | 121.3   | 11.7   | 86.8      | 10.0     | 0.030   |           |        |        |             |          |          |         |
| Number of primary tumors monitored for growth                        | Rank sum test | 20   | 25     |         |        |           |          |         | 3.0       | 1.0    | 4.0    | 1.0         | 1.0      | 2.0      | 0.033   |
| Largest tumor at necropsy volume mm <sup>3</sup>                     | Rank sum test | 20   | 25     |         |        |           |          |         | 70.0      | 48.2   | 191.6  | 357.1       | 63.8     | 478.9    | 0.073   |
| Slope of growth curve for largest tumor: (tumor volume)/Days post-UV | Rank sum test | 20   | 25     |         |        |           |          |         | 0.0083    | 0.0058 | 0.0154 | 0.0154      | 0.0113   | 0.0361   | 0.014   |
| Final Combined Tumor Volume mm <sup>3</sup>                          | Rank sum test | 20   | 25     |         |        |           |          |         | 210.4     | 125.5  | 402.9  | 559.4       | 249.4    | 1009.8   | 0.028   |
| Lung metastasis score                                                | Rank sum test | 20   | 25     |         |        |           |          |         | 0.0       | 0.0    | 1.5    | 12.0        | 0.0      | 79.5     | < 0.001 |
| Composite lymph node volume score                                    | Rank sum test | 20   | 25     |         |        |           |          |         | 1.5       | 0.0    | 6.8    | 8.0         | 3.0      | 37.0     | 0.007   |

**C.** Comparisons of tumor growth characteristics and metastasis scores for male vs female mice across all genotypes

| Variable                                                               | Test*         | Male n | Female n | Male Mean | Male SEM | Female Mean | Female SEM | P-Value | Male Median | Male 25% | Male 75% | Female Median | Female 25% | Female 75% | P-Value |
|------------------------------------------------------------------------|---------------|--------|----------|-----------|----------|-------------|------------|---------|-------------|----------|----------|---------------|------------|------------|---------|
| Tumor onset days post-irradiation                                      | Rank sum test | 37     | 32       |           |          |             |            |         | 148         | 92.00    | 173.0    | 104.50        | 78.750     | 168.5      | 0.188   |
| Days between onset and endpoint                                        | t-test        | 37     | 32       | 114.6     | 8.9      | 86.7        | 7.5        | 0.021   |             |          |          |               |            |            |         |
| Number of primary tumors monitored for growth                          | Rank sum test | 37     | 32       |           |          |             |            |         | 2.0         | 1.0      | 3.5      | 1.0           | 1.0        | 2.0        | 0.006   |
| Largest tumor at necropsy volume mm <sup>3</sup>                       | Rank sum test | 37     | 32       |           |          |             |            |         | 198.5       | 82.6     | 425.4    | 153.9         | 40.2       | 613.3      | 0.661   |
| Slope of growth curve for largest tumor: (tumor volume)/Days post-UV** | Rank sum test | 37     | 32       |           |          |             |            |         | 0.00929     | 0.00654  | 0.0156   | 0.0148        | 0.0113     | 0.0295     | 0.005   |
| Final Combined Tumor Volume mm <sup>3</sup>                            | Rank sum test | 37     | 32       |           |          |             |            |         | 343.7       | 210.1    | 800.8    | 259.0         | 65.4       | 670.3      | 0.134   |
| Lung metastasis score                                                  | Rank sum test | 37     | 32       |           |          |             |            |         | 0.0         | 0.0      | 10.0     | 20.5          | 2.3        | 80.8       | < 0.001 |
| Composite lymph node volume score                                      | Rank sum test | 37     | 32       |           |          |             |            |         | 4.0         | 1.0      | 9.5      | 14.0          | 2.3        | 57.0       | 0.008   |

**D.** Comparisons of tumor growth characteristics and metastasis scores for male HP vs HPN1 mice

| Variable                                                             | Test*         | HP n | HPN1 n | HP Mean | HP SEM | HPN1 Mean | HPN1 SEM | P-Value | HP Median | HP 25% | HP 75% | HPN1 Median | HPN1 25% | HPN1 75% | P-Value |
|----------------------------------------------------------------------|---------------|------|--------|---------|--------|-----------|----------|---------|-----------|--------|--------|-------------|----------|----------|---------|
| Tumor onset days post-irradiation                                    | t-test        | 14   | 15     | 133.9   | 10.9   | 154.6     | 14.5     | 0.271   |           |        |        |             |          |          |         |
| Days between onset and endpoint                                      | t-test        | 14   | 15     | 136.1   | 14.7   | 93.9      | 12.2     | 0.035   |           |        |        |             |          |          |         |
| Number of primary tumors monitored for growth                        | Rank sum test | 14   | 15     |         |        |           |          |         | 3.5       | 1.75   | 4.0    | 2.0         | 1.0      | 3.0      | 0.043   |
| Largest tumor at necropsy volume mm <sup>3</sup>                     | Rank sum test | 14   | 15     |         |        |           |          |         | 82.6      | 46.9   | 161.1  | 357.3       | 150.0    | 669.0    | 0.012   |
| Slope of growth curve for largest tumor: (tumor volume)/Days post-UV | Rank sum test | 14   | 15     |         |        |           |          |         | 0.0079    | 0.0055 | 0.0149 | 0.0124      | 0.0064   | 0.0167   | 0.419   |
| Final Combined Tumor Volume mm <sup>3</sup>                          | Rank sum test | 14   | 15     |         |        |           |          |         | 210.4     | 164.1  | 354.3  | 390.3       | 258.4    | 849.2    | 0.052   |
| Lung metastasis score                                                | Rank sum test | 14   | 15     |         |        |           |          |         | 0.0       | 0.0    | 0.0    | 5.0         | 0.0      | 32.0     | 0.005   |
| Composite lymph node volume score                                    | Rank sum test | 14   | 15     |         |        |           |          |         | 1.0       | 0.0    | 4.0    | 6.0         | 4.0      | 18.0     | 0.013   |

**E.** Comparisons of tumor growth characteristics and metastasis scores for male HP vs HPN2 mice

| Variable                                                             | Test*         | HP n | HPN2 n | HP Mean | HP SEM | HPN2 Mean | HPN2 SEM | P-Value | HP Median | HP 25% | HP 75% | HPN2 Median | HPN2 25% | HPN2 75% | P-Value |
|----------------------------------------------------------------------|---------------|------|--------|---------|--------|-----------|----------|---------|-----------|--------|--------|-------------|----------|----------|---------|
| Tumor onset days post-irradiation                                    | t-test        | 14   | 8      | 133.9   | 10.9   | 121.0     | 19.3     | 0.535   |           |        |        |             |          |          |         |
| Days between onset and endpoint                                      | t-test        | 14   | 8      | 136.1   | 14.7   | 115.6     | 20.3     | 0.417   |           |        |        |             |          |          |         |
| Number of primary tumors monitored for growth                        | t-test        | 14   | 8      | 3.0     | 0.3    | 1.8       | 0.4      | 0.031   |           |        |        |             |          |          |         |
| Largest tumor at necropsy volume mm <sup>3</sup>                     | Rank sum test | 14   | 8      |         |        |           |          |         | 82.6      | 46.9   | 161.1  | 371.3       | 156.5    | 444.0    | 0.005   |
| Slope of growth curve for largest tumor: (tumor volume)/Days post-UV | Rank sum test | 14   | 8      |         |        |           |          |         | 0.0079    | 0.0055 | 0.0149 | 0.0111      | 0.0073   | 0.0147   | 0.357   |
| Final Combined Tumor Volume mm <sup>3</sup>                          | Rank sum test | 14   | 8      |         |        |           |          |         | 210.4     | 164.1  | 354.3  | 798.8       | 444.1    | 1152.4   | 0.004   |
| Lung metastasis score                                                | Rank sum test | 14   | 8      |         |        |           |          |         | 0.0       | 0.0    | 0.0    | 1.5         | 0.0      | 73.8     | 0.029   |
| Composite lymph node volume score                                    | Rank sum test | 14   | 8      |         |        |           |          |         | 1.0       | 0.0    | 4.0    | 4.5         | 3.0      | 14.5     | 0.049   |

**F.** Comparisons of tumor growth characteristics and metastasis scores for face tumor-positive vs face tumor-negative mice across all genotypes

| Variable                                                             | Test*         | Face tumor-positive n | Face tumor-negative n | Face tumor-positive Mean | Face tumor-positive SEM | Face tumor-negative Mean | Face tumor-negative SEM | P-Value | Face tumor-positive Median | Face tumor-positive 25% | Face tumor-positive 75% | Face tumor-negative Median | Face tumor-negative 25% | Face tumor-negative 75% | P-Value |
|----------------------------------------------------------------------|---------------|-----------------------|-----------------------|--------------------------|-------------------------|--------------------------|-------------------------|---------|----------------------------|-------------------------|-------------------------|----------------------------|-------------------------|-------------------------|---------|
| Tumor onset days post-irradiation                                    | Rank sum test | 9                     | 60                    |                          |                         |                          |                         |         | 129.5                      | 82.0                    | 168.5                   | 127.0                      | 95.0                    | 198.5                   | 0.769   |
| Days between onset and endpoint                                      | t-test        | 9                     | 60                    | 63.0                     | 10.7                    | 107.4                    | 6.5                     | 0.013   |                            |                         |                         |                            |                         |                         |         |
| Number of primary tumors monitored for growth                        | Rank sum test | 9                     | 60                    |                          |                         |                          |                         |         | 1.0                        | 1.0                     | 3.0                     | 2.0                        | 1.0                     | 3.0                     | 0.635   |
| Largest tumor at necropsy volume mm <sup>3</sup>                     | Rank sum test | 9                     | 60                    |                          |                         |                          |                         |         | 145.8                      | 63.2                    | 388.1                   | 191.9                      | 50.4                    | 553.3                   | 0.515   |
| Slope of growth curve for largest tumor: (tumor volume)/Days post-UV | Rank sum test | 9                     | 60                    |                          |                         |                          |                         |         | 0.013                      | 0.010                   | 0.028                   | 0.012                      | 0.007                   | 0.018                   | 0.418   |
| Final Combined Tumor Volume mm <sup>3</sup>                          | Rank sum test | 9                     | 60                    |                          |                         |                          |                         |         | 261.0                      | 68.7                    | 408.7                   | 312.0                      | 169.5                   | 807.6                   | 0.236   |
| Lung metastasis score                                                | Rank sum test | 9                     | 60                    |                          |                         |                          |                         |         | 110.0                      | 1.0                     | 188.0                   | 3.0                        | 0.0                     | 29.3                    | 0.028   |
| Composite lymph node volume score                                    | Rank sum test | 9                     | 60                    |                          |                         |                          |                         |         | 107.0                      | 22.5                    | 208.5                   | 5.0                        | 1.0                     | 15.5                    | 0.001   |

**G.** Comparisons of tumor growth characteristics and metastasis scores for face tumor-negative HP vs HPN1 mice

| Variable                                                             | Test*         | HP n | HPN1 n | HP Mean | HP SEM | HPN1 Mean | HPN1 SEM | P-Value | HP Median | HP 25% | HP 75% | HPN1 Median | HPN1 25% | HPN1 75% | P-Value |
|----------------------------------------------------------------------|---------------|------|--------|---------|--------|-----------|----------|---------|-----------|--------|--------|-------------|----------|----------|---------|
| Tumor onset days post-irradiation                                    | t-test        | 18   | 22     | 132.7   | 10.5   | 142.1     | 12.1     | 0.570   |           |        |        |             |          |          |         |
| Days between onset and endpoint                                      | t-test        | 18   | 22     | 126.6   | 12.4   | 105.1     | 9.7      | 0.173   |           |        |        |             |          |          |         |
| Number of primary tumors monitored for growth                        | Rank sum test | 18   | 22     |         |        |           |          |         | 3.0       | 1.0    | 4.0    | 2.0         | 1.0      | 2.3      | 0.042   |
| Largest tumor at necropsy volume mm <sup>3</sup>                     | Rank sum test | 18   | 22     |         |        |           |          |         | 67.8      | 46.9   | 209.1  | 258.3       | 83.2     | 661.6    | 0.084   |
| Slope of growth curve for largest tumor: (tumor volume)/Days post-UV | Rank sum test | 18   | 22     |         |        |           |          |         | 0.0079    | 0.0055 | 0.0149 | 0.0118      | 0.0073   | 0.0164   | 0.271   |
| Final Combined Tumor Volume mm <sup>3</sup>                          | Rank sum test | 18   | 22     |         |        |           |          |         | 210.4     | 145.5  | 409.6  | 318.6       | 162.0    | 802.8    | 0.216   |
| Lung metastasis score                                                | Rank sum test | 18   | 22     |         |        |           |          |         | 0.0       | 0.0    | 0.5    | 8.5         | 0.0      | 39.0     | 0.001   |
| Composite lymph node volume score                                    | Rank sum test | 18   | 22     |         |        |           |          |         | 1.0       | 0.0    | 3.8    | 6.5         | 4.8      | 21.5     | < 0.001 |

**H.** Comparisons of tumor growth characteristics and metastasis scores for face tumor-negative HP vs HPN2 mice

| Variable                                                             | Test*         | HP n | HPN2 n | HP Mean | HP SEM | HPN2 Mean | HPN2 SEM | P-Value | HP Median | HP 25% | HP 75% | HPN2 Median | HPN2 25% | HPN2 75% | P-Value |
|----------------------------------------------------------------------|---------------|------|--------|---------|--------|-----------|----------|---------|-----------|--------|--------|-------------|----------|----------|---------|
| Tumor onset days post-irradiation                                    | Rank sum test | 18   | 20     |         |        |           |          |         | 143.0     | 91.3   | 163.3  | 86.0        | 69.8     | 175.3    | 0.365   |
| Days between onset and endpoint                                      | t-test        | 18   | 20     | 126.6   | 12.4   | 92.7      | 11.5     | 0.052   |           |        |        |             |          |          |         |
| Number of primary tumors monitored for growth                        | Rank sum test | 18   | 20     |         |        |           |          |         | 3.0       | 1.0    | 4.0    | 1.0         | 1.0      | 2.0      | 0.038   |
| Largest tumor at necropsy volume mm <sup>3</sup>                     | Rank sum test | 18   | 20     |         |        |           |          |         | 67.8      | 46.9   | 209.1  | 371.3       | 82.6     | 543.3    | 0.093   |
| Slope of growth curve for largest tumor: (tumor volume)/Days post-UV | Rank sum test | 18   | 20     |         |        |           |          |         | 0.0079    | 0.0055 | 0.0149 | 0.0156      | 0.0114   | 0.0430   | 0.007   |
| Final Combined Tumor Volume mm <sup>3</sup>                          | Rank sum test | 18   | 20     |         |        |           |          |         | 210.4     | 145.5  | 409.6  | 764.2       | 254.8    | 1119.1   | 0.023   |
| Lung metastasis score                                                | Rank sum test | 18   | 20     |         |        |           |          |         | 0.0       | 0.0    | 0.5    | 5.0         | 0.0      | 57.3     | 0.001   |
| Composite lymph node volume score                                    | Rank sum test | 18   | 20     |         |        |           |          |         | 1.0       | 0.0    | 3.8    | 6.0         | 3.0      | 18.5     | 0.005   |

**I.** Correlations of tumor growth characteristics and metastasis scores across all HP, HPN1 and HPN2 mice\*\*

| Variable                                                             | n  | Lung metastasis score |         | Lymph node enlargement score |         |
|----------------------------------------------------------------------|----|-----------------------|---------|------------------------------|---------|
|                                                                      |    | r                     | P-Value | r                            | P-Value |
| Tumor onset days post-irradiation                                    | 69 | -0.003                | 0.982   | 0.080                        | 0.512   |
| Days between onset and endpoint                                      | 69 | -0.102                | 0.401   | 0.011                        | 0.931   |
| Number of primary tumors monitored for growth                        | 69 | -0.080                | 0.515   | -0.034                       | 0.780   |
| Largest tumor at necropsy volume mm <sup>3</sup>                     | 69 | 0.140                 | 0.251   | -0.072                       | 0.553   |
| Slope of growth curve for largest tumor: (tumor volume)/Days post-UV | 69 | 0.146                 | 0.232   | 0.001                        | 0.995   |
| Final Combined Tumor Volume mm <sup>3</sup>                          | 69 | 0.123                 | 0.314   | -0.059                       | 0.628   |
| Lung metastasis score                                                | 69 |                       |         | 0.740                        | < 0.001 |

\* The parametric Student's t-test was used to compare variables that were normally distributed, and the non-parametric Mann-Whitney rank sum test was used to test variables that were not normally distributed.

\*\* The non-parametric Spearman correlation test was used for all analyses.
